# Supplementary material
Source: PubMed Central journal article supplement (PMC6871421)
Supplement: HBM-28-502-s001.pdf [file HBM-28-502-s001.pdf]

**Supplementary Table 1: Exclusion and inclusion criteria**

|                        |                                                                                                                                                                                                                                | <b>Instrument</b> | <b>Actions</b>                                                                                          |
|------------------------|--------------------------------------------------------------------------------------------------------------------------------------------------------------------------------------------------------------------------------|-------------------|---------------------------------------------------------------------------------------------------------|
| A) Demographics        | 1. Both biological parents are French Canadians (2 generations)                                                                                                                                                                | A07f              | Inclusion                                                                                               |
|                        | 2. Both parents are available for providing a blood sample                                                                                                                                                                     | A07f              | Inclusion                                                                                               |
|                        | 3. There are two siblings in the eligible age range (12 to 18 years)                                                                                                                                                           | A07f              | Inclusion                                                                                               |
|                        | 4. Child, parent or grand-parent is adopted                                                                                                                                                                                    | A07f              | Exclusion                                                                                               |
| B) Pregnancy and birth | 1. Exposed: Prenatal exposure to maternal cigarette smoking (1 cigarette or more per day) during the 2nd trimester.                                                                                                            | A07f              | Inclusion                                                                                               |
|                        | 2. Non-exposed: No maternal cigarette smoking during the following two periods: <ul style="list-style-type: none"> <li>▪ 12 months before the pregnancy</li> <li>▪ during pregnancy</li> <li>▪ during breastfeeding</li> </ul> | A07f              | Inclusion                                                                                               |
|                        | 3. Use of alcohol by the mother during pregnancy                                                                                                                                                                               | B02f              | Exclusion (>210 ml alcohol/week [e.g. 14 bottles of beer, 9 glasses of wine, 7 glasses of hard liquor]. |
|                        | 4. Diabetes of the mother during pregnancy (onset before pregnancy, treated by insulin)                                                                                                                                        | A07f              | Exclusion                                                                                               |
|                        | 5. Premature birth (< 35 weeks) and/or detached placenta                                                                                                                                                                       | A07f              | Exclusion                                                                                               |
|                        | 6. Multiple births (e.g. twins)                                                                                                                                                                                                | A07f              | Exclusion                                                                                               |
|                        | 7. Hyperbilirubinemia requiring transfusion                                                                                                                                                                                    | A07f              | Exclusion                                                                                               |

|                              |                                                                                                                                         |                  |           |
|------------------------------|-----------------------------------------------------------------------------------------------------------------------------------------|------------------|-----------|
| C) Child's medical history   | 1. Type 1 diabetes                                                                                                                      | A07f             | Exclusion |
|                              | 2. Systemic rheumatologic disorders (e.g. complications of strep throat, such as glomerulonephritis or endocarditis)                    | A07f             | Exclusion |
|                              | 3. Malignant tumours requiring chemotherapy (e.g. leukaemia)                                                                            | A07f             | Exclusion |
|                              | 4. Congenital heart defects or heart surgery                                                                                            | A07f             | Exclusion |
|                              | 5. Aneurysm                                                                                                                             |                  | Exclusion |
| D) Neurological conditions   | 1. Epilepsy<br>2. Bacterial Infection of CNS<br>3. Brain tumour                                                                         | A07f             | Exclusion |
|                              | 4. Head trauma with loss of consciousness >30 minutes                                                                                   | A07f             | Exclusion |
|                              | 5. Muscular dystrophy, myotonic dystrophy                                                                                               | A07f             | Exclusion |
| E) Developmental conditions  | 1. Nutritional and metabolic diseases (e.g. failure to thrive, phenylketonuria)<br>2. Major neuro-developmental disorders (e.g. autism) | A07f             | Exclusion |
|                              | 3. Hearing deficit (requiring hearing aid)                                                                                              | A07f             | Exclusion |
|                              | 4. Vision problems (strabismus, visual deficit not correctable)                                                                         | A07f             | Exclusion |
|                              |                                                                                                                                         |                  |           |
| F) Mental health & abilities | 1. Treatment for schizophrenia, bipolar disorder                                                                                        | A07f             | Exclusion |
|                              | 2. IQ < 70                                                                                                                              | WISC             | Exclusion |
|                              | 3. Reading ability (< 2 SD)                                                                                                             | Woodcock-Johnson | Exclusion |
|                              | 4. Special education (special classes)                                                                                                  | A07f             | Exclusion |
| G) MR contraindications      | 1. Metal implants                                                                                                                       | A07f             | Exclusion |
|                              | 2. Electronic implants (e.g. pacemakers)                                                                                                | A07f             | Exclusion |
|                              | 3. Severe claustrophobia                                                                                                                | A07f             | Exclusion |

A07f, Telephone interview; B02f, Medical questionnaire; WISC, Wechsler Intelligence Scale for Children; CNS, Central nervous system; IQ, Intelligence quotient.
