# Supplementary material
Source: PubMed Central journal article supplement (PMC6871421)
Supplement: HBM-28-502-s002.pdf [file HBM-28-502-s002.pdf]

## SUPPLEMENTARY TABLE 2: INSTRUMENTS

### 1: SCREENING

| Instrument          | Duration (min) | Code name | Tool               | Data Entry      |
|---------------------|----------------|-----------|--------------------|-----------------|
| Telephone Interview | 20             | A07f      | Intreview Software | Computer Upload |

### 2: HOME VISIT

| Instrument                                    | Duration (min) | Code name | Tool          | Data Entry        |
|-----------------------------------------------|----------------|-----------|---------------|-------------------|
| Medical & SES Questionnaire                   | 40             | B02f      | Questionnaire | Manual            |
| Consent - Mother                              | 10             | B04f      | Form          | Filed Not entered |
| Consent - Father                              | 10             | B11f      | Form          | Filed Not entered |
| Assent                                        | 10             | B05f      | Form          | Filed Not entered |
| Family Environment                            | 40             | B09f      | Questionnaire | Scanner (OMR)     |
| Mental Health & Anti-social Behaviour: Mother | 20             | B10f      | Questionnaire | Scanner (OMR)     |
| Mental Health & Anti-social Behaviour: Father | 20             | B12f      | Questionnaire | Scanner (OMR)     |
| Positive Youth Development                    | 20             | B08f      | Questionnaire | Scanner (OMR)     |
| Handedness: Father & His Relatives            | 20             | B15f      | Form          | Manual (GUI)      |
| Handedness: Mother & Her Relatives            | 20             | B17f      | Form          | Manual (GUI)      |
| Healthy Lifestyle                             | 20             | J02f      | Questionnaire | Scanner (OMR)     |
| Blood sample (parents)                        | 10             |           |               |                   |
| <b>Session Duration (Min): Mother</b>         | <b>140</b>     |           |               |                   |
| <b>Session Duration (Min): Father</b>         | <b>60</b>      |           |               |                   |
| <b>Session Duration (Min): Adolescent</b>     | <b>50</b>      |           |               |                   |

### 3: LABORATORY (NEUROPSYCHOLOGY)

| Instrument                                                                                             | Duration (min) | Code name | Tool                                       | Data Entry      |
|--------------------------------------------------------------------------------------------------------|----------------|-----------|--------------------------------------------|-----------------|
| Handedness: Adolescent                                                                                 | 5              | E01f      | MNI                                        | Manual (GUI)    |
| Wechsler Intelligence Scale-III                                                                        | 60             |           | WISC                                       | Manual (GUI)    |
| Academic Abilities: Math, Math Fluency, Reading Comprehension & Spelling subscales of Woodcock-Johnson | 45             | E30-33f   | W-J                                        | Manual (GUI)    |
| Long-term Memory: Children's Memory Scale                                                              | 5              | E12f      | CMS                                        | Manual (GUI)    |
| Short-term Memory: Digit Span                                                                          | 5              |           | Form                                       | Manual (GUI)    |
| Working Memory: Self-ordered Pointing (Cuffed)                                                         | 3              | E25f      | Npsych PC (NeuroCog Battery SW) /Finometer | Computer Upload |
| Sustained Attention: Ruff 2-7                                                                          | 7              | E08f      | Form                                       | Manual (GUI)    |
| Resistance to Interference: Stroop                                                                     | 3              | E28f      | Form                                       | Manual (GUI)    |

|                                                                 |            |      |                                            |                 |
|-----------------------------------------------------------------|------------|------|--------------------------------------------|-----------------|
| Divergent Thinking: Word Fluency                                | 7          | E29f | Form                                       | Manual (GUI)    |
| Fine Motor Skills: Grooved Pegboard                             | 7          | E10f | Form/Hardware                              | Manual (GUI)    |
| Motor speed: Tapping                                            | 5          | E40f | Test                                       | Manual (GUI)    |
| Transcallosal Interaction: Bimanual Coordination                | 15         | E41f | Npsych PC (MeasurEnd SW)                   | Computer Upload |
| Temporal Processing of Sound: Frequency-Modulation Threshold    | 10         | E36f | Npsych PC (Oxford SW)                      | Computer Upload |
| Phonological learning                                           | 20         | E37f | Npsych PC (Oxford SW)                      | Computer Upload |
| Awareness of Self-generated Movement: Delayed Auditory Feedback | 12         | E43f | Npsych PC (CoolEdit)                       | Computer Upload |
| Body Image Perception                                           | 15         | E38f | Npsych PC (Presentation)                   | Computer Upload |
| Imitation: Runner Observation (Cuffed)                          | 10         | E24f | Npsych PC (Presentation)/Finometer         | Computer Upload |
| Perception of Facial Expressions: Pollak Faces (Cuffed)         | 10         | E26f | Npsych PC (Superlab)/Finometer             | Computer Upload |
| Sensitivity to Gains & Loses: Newman's Card Playing (Cuffed)    | 5          | E25f | Npsych PC (NeuroCog Battery SW) /Finometer | Computer Upload |
| Sensitivity to Failure: Repeated Failure Test (Cuffed)          | 15         | E23f | Npsych PC (Superlab, CoolEdit)/Finometer   | Computer Upload |
| Number Sense                                                    | 7          | E35f | Npsych PC (Superlab)                       | Computer Upload |
| <b>Session Duration (Min): Adolescent</b>                       | <b>271</b> |      |                                            |                 |

#### 4: HOSPITAL (MAGNETIC RESONANCE IMAGING)

| Instrument                                | Duration (min) | Code name | Tool                 | Data Entry |
|-------------------------------------------|----------------|-----------|----------------------|------------|
| Brain T1W MRI                             | 16             | H04f      | Philips 1.0T scanner | CD Upload  |
| Brain T2W/PDW MRI                         | 14             | H05f      | Philips 1.0T scanner | CD Upload  |
| Brain MT MRI                              | 12             | H06f      | Philips 1.0T scanner | CD Upload  |
| Abdominal MRI                             | 5              | H07f      | Philips 1.0T scanner | CD Upload  |
| Phantoms (Living & ACR)                   |                | H13f      | Philips 1.0T scanner | CD Upload  |
| Radiologist report                        |                | M06f      | Form                 | Manual     |
| <b>Session Duration (Min): Adolescent</b> | <b>47</b>      |           |                      |            |

#### 5: HOSPITAL (QUESTIONNAIRES)

| Instrument                             | Duration (min) | Code name | Tool          | Data Entry    |
|----------------------------------------|----------------|-----------|---------------|---------------|
| Food Recall                            | 30             | J03f      | Questionnaire | Scanner (OMR) |
| Psychiatric Diagnosis Likelihood (DPS) | 20             | P05f      | Questionnaire | Scanner (OMR) |

**Session Duration (Min): Adolescent 50**

**6: HOSPITAL (CARDIOVASCULAR REACTIVITY)**

| <b>Instrument</b> | <b>Duration (min)</b> | <b>Code name</b> | <b>Tool</b> | <b>Data Entry</b> |
|-------------------|-----------------------|------------------|-------------|-------------------|
| Posture Test      | 30                    | N06f             | Form (p1+4) | Manual            |
| Math Stress Test  | 20                    | N06F             | Form (p6)   | Scanner (OMR)     |
| Salivary Cortisol | 1                     | N05f             | Salivette   | Manual            |

**Session Duration (Min): Adolescent 51**

**7: HOSPITAL (BODY COMPOSITION)**

| <b>Instrument</b>             | <b>Duration (min)</b> | <b>Code name</b> | <b>Tool</b>      | <b>Data Entry</b> |
|-------------------------------|-----------------------|------------------|------------------|-------------------|
| Anthropometry                 | 10                    | N06f             | Form (p2+W+H)    | Manual            |
| Bioimpedance/Body Composition | 20                    | N06f             | Form (p3)/Xitron | Manual/CD Upload  |

**Session Duration (Min): Adolescent 30**

**8: SCHOOL (QUESTIONNAIRES, BLOOD SAMPLE)**

| <b>Instrument</b>                      | <b>Schedule</b> | <b>Code name</b> | <b>Tool</b>   | <b>Data Entry</b> |
|----------------------------------------|-----------------|------------------|---------------|-------------------|
| Personality: NEO-PI                    | 50              | P04f             | Questionnaire | Scanner (OMR)     |
| Adolescent Behaviour                   | 25              | J04f             | Questionnaire | Scanner (OMR)     |
| Adolescent School Experience & Friends | 25              | P06f             | Questionnaire | Scanner (OMR)     |
| Blood sample                           | 5               | P02f             | BD Vacutainer | Manual (GUI)      |
| Appreciation-ADO                       | 10              | P07f             | Questionnaire | Scanner (OMR)     |

**Session Duration (Min): Adolescent 115**

**9: OTHER INSTRUMENTS**

| <b>Instrument</b> | <b>Schedule</b> | <b>Code name</b> | <b>Tool</b> | <b>Data Entry</b> |
|-------------------|-----------------|------------------|-------------|-------------------|
| Medical Chart     | N/A             | Q02f             | Form        | Manual (GUI)      |

SES, Socioeconomic status; OMR, Optical Mark Reading; GUI, Graphical user interface; MNI, Montreal Neurological Institute; W-J, Woodcock-Johnson; WISC, Wechsler Intelligence Scale for Children; CMS, Children's Memory Scale; NPsych PC, neuropsychological personal computer; SW, software; MRI, Magnetic resonance imaging; ACR, American college of radiology; CD, compact disk, MT, Magnetization transfer.
