# Supplementary material
Source: PubMed Central journal article supplement (PMC6871421)
Supplement: HBM-28-502-s003.pdf [file HBM-28-502-s003.pdf]

### SUPPLEMENTARY TABLE 3: QUESTIONNAIRES

#### A. Demographics

| Domains/Scales                            | Respondent    | Instrument (code name)                    | Source |
|-------------------------------------------|---------------|-------------------------------------------|--------|
| Eligibility                               | Mother        | Telephone Interview (A07f)                | SYS    |
| Parents' DOB & Education Level            | Mother        | Telephone Interview (A07f)                | SYS    |
| Family structure (birth, 3yr, 10 yr. now) | Mother        | Medical & SES Questionnaire (B02f)        | SYS    |
| Primary caregiver (birth to 4yr)          | Mother        | Medical & SES Questionnaire (B02f)        | SYS    |
| Height and weight of the parents          | Mother        | Medical & SES Questionnaire (B02f)        | SYS    |
| Place and date of birth of parents        | Mother        | Medical & SES Questionnaire (B02f)        | SYS    |
| Parental Employment Status                | Mother        | Medical & SES Questionnaire (B02f)        | SYS    |
| Family income                             | Mother        | Medical & SES Questionnaire (B02f)        | SYS    |
| Type of residence                         | Mother        | Medical & SES Questionnaire (B02f)        | SYS    |
| Stressful events                          | Mother/Father | Family environment (B09f)                 | SYS    |
| Parental education                        | Mother/Father | Family environment (B09f)                 | SYS    |
| Handedness of the mother & her relatives  | Mother        | Handedness: Mother & Her Relatives (B17f) | MNI    |
| Handedness of the father & his relatives  | Father        | Handedness: Father & His Relatives (B15f) | MNI    |
| Handedness of the adolescent              | Adolescent    | Handedness: Adolescent (E01f)             | MNI    |

#### B. Medical and Psychiatric History

| Domains/Scales                                   | Respondent | Instrument (code name)                       | Source |
|--------------------------------------------------|------------|----------------------------------------------|--------|
| Child's medical history                          | Mother     | Telephone Interview (A07f)                   | SYS    |
| MR contraindications                             | Mother     | Telephone Interview (A07f)                   | SYS    |
| Pregnancies, stillbirths, abortions, IVF         | Mother     | Medical & SES Questionnaire (B02f)           | SYS    |
| Pregnancy and birth                              | Mother     | Medical & SES Questionnaire (B02f)           | SYS    |
| Breastfeeding                                    | Mother     | Medical & SES Questionnaire (B02f)           | SYS    |
| Child's medical and psychiatric history          | Mother     | Medical & SES Questionnaire (B02f)           | SYS    |
| Family medical history<br>(1st degree relatives) | Mother     | Medical & SES Questionnaire (B02f)           | SYS    |
| Mother's Depression                              | Mother     | Mental Health & Anti-social Behaviour (B10f) | GRIP-A |
| Mother's Anxiety                                 | Mother     | Mental Health & Anti-social Behaviour (B10f) | GRIP-B |
| Father's Depression                              | Father     | Mental Health & Anti-social Behaviour (B12f) | GRIP-A |
| Father's Anxiety                                 | Father     | Mental Health & Anti-social Behaviour (B12f) | GRIP-B |

|                                          |            |                                         |            |
|------------------------------------------|------------|-----------------------------------------|------------|
| Hyperactivity                            | Adolescent | Adolescent behaviour (J04f)             | GRIP-C     |
| Inattention                              | Adolescent | Adolescent behaviour (J04f)             | GRIP-C     |
| Anxiety                                  | Adolescent | Adolescent behaviour (J04f)             | GRIP-C     |
| Depression & Suicide                     | Adolescent | Adolescent behaviour (J04f)             | GRIP-A     |
| Social phobia                            | Adolescent | Psychiatric diagnosis likelihood (P05f) | DPS        |
| Simple Anxiety Disorder                  | Adolescent | Psychiatric diagnosis likelihood (P05f) | DPS        |
| Agoraphobia                              | Adolescent | Psychiatric diagnosis likelihood (P05f) | DPS        |
| Panic                                    | Adolescent | Psychiatric diagnosis likelihood (P05f) | DPS        |
| Generalized Anxiety Disorder             | Adolescent | Psychiatric diagnosis likelihood (P05f) | DPS        |
| Specific Phobia                          | Adolescent | Psychiatric diagnosis likelihood (P05f) | DPS        |
| Obsessive Compulsive Disorder            | Adolescent | Psychiatric diagnosis likelihood (P05f) | DPS        |
| Eating Disorder                          | Adolescent | Psychiatric diagnosis likelihood (P05f) | DPS        |
| Elimination Disorder                     | Adolescent | Psychiatric diagnosis likelihood (P05f) | DPS        |
| Major Depressive Disorder                | Adolescent | Psychiatric diagnosis likelihood (P05f) | DPS        |
| Mania                                    | Adolescent | Psychiatric diagnosis likelihood (P05f) | DPS        |
| Schizophrenia                            | Adolescent | Psychiatric diagnosis likelihood (P05f) | DPS        |
| Attention Deficit Hyperactivity Disorder | Adolescent | Psychiatric diagnosis likelihood (P05f) | DPS        |
| Oppositional Defiant Disorder            | Adolescent | Psychiatric diagnosis likelihood (P05f) | DPS        |
| Conduct Disorder                         | Adolescent | Psychiatric diagnosis likelihood (P05f) | DPS        |
| Alcohol                                  | Adolescent | Psychiatric diagnosis likelihood (P05f) | DPS        |
| Marijuana Dependence                     | Adolescent | Psychiatric diagnosis likelihood (P05f) | DPS        |
| Other Substances Abused                  | Adolescent | Psychiatric diagnosis likelihood (P05f) | DPS        |
| Concussion                               | Adolescent | Healthy Lifestyle (J02f)                | D. Goodman |

### C. Cigarettes, Alcohol & Drugs

| Domains/Scales                                           | Respondent | Instrument (code name)                       | Source |
|----------------------------------------------------------|------------|----------------------------------------------|--------|
| Maternal cigarette smoking<br>(past, present, pregnancy) | Mother     | Telephone Interview (A07f)                   | SYS    |
| Maternal cigarettes smoking<br>(during pregnancy)        | Physician  | Obstetric chart                              | QMH    |
| Second hand smoke during pregnancy                       | Mother     | Medical & SES Questionnaire (B02f)           | SYS    |
| Father's cigarette smoking                               | Father     | Mental Health & Anti-social Behaviour (B12f) | GRIP-D |

|                                  |               |                                              |        |
|----------------------------------|---------------|----------------------------------------------|--------|
| Ado drugs, alcohol, sexual abuse | Mother/Father | Family environment (B09f)                    | SYS    |
| Mother's alcohol and drug use    | Mother        | Mental Health & Anti-social Behaviour (B10f) | GRIP-D |
| Father's alcohol and drug use    | Father        | Mental Health & Anti-social Behaviour (B12f) | GRIP-D |
| Cigarette smoking                | Adolescent    | Adolescent behaviour (J04f)                  | GRIP-E |
| Drugs & Alcohol                  | Adolescent    | Adolescent behaviour (J04f)                  | GRIP-F |

#### **D. Anti-social Behaviour**

| <b>Domains/Scales</b>                                    | <b>Respondent</b> | <b>Instrument (code name)</b>                | <b>Source</b> |
|----------------------------------------------------------|-------------------|----------------------------------------------|---------------|
| Mother's Anti-social behaviour                           | Mother            | Mental Health & Anti-social Behaviour (B10f) | GRIP-G        |
| Father's Anti-social behaviour                           | Father            | Mental Health & Anti-social Behaviour (B12f) | GRIP-G        |
| Physical aggression                                      | Adolescent        | Adolescent behaviour (J04f)                  | GRIP-C        |
| Indirect aggression                                      | Adolescent        | Adolescent behaviour (J04f)                  | GRIP-H        |
| Fighting                                                 | Adolescent        | Adolescent behaviour (J04f)                  | GRIP-I        |
| Stealing                                                 | Adolescent        | Adolescent behaviour (J04f)                  | GRIP-I        |
| Vandalism                                                | Adolescent        | Adolescent behaviour (J04f)                  | GRIP-I        |
| Friends & problems                                       | Adolescent        | Ado School Experience & Friends (P06f)       | ÉCOBES-A      |
| Acceptance of societal phenomena<br>(illegal activities) | Adolescent        | Ado School Experience & Friends (P06f)       | ÉCOBES-B      |

#### **E. Lifestyle**

| <b>Domains/Scales</b>             | <b>Respondent</b> | <b>Instrument (code name)</b>          | <b>Source</b>     |
|-----------------------------------|-------------------|----------------------------------------|-------------------|
| Physical activity (sports)        | Adolescent        | Healthy Lifestyle (J02f)               | Sante Quebec      |
| Nutrition (Food frequency)        | Adolescent        | Healthy Lifestyle (J02f)               | Sante Quebec      |
| Sleep                             | Adolescent        | Healthy Lifestyle (J02f)               | J Carrier         |
| Sexuality                         | Adolescent        | Adolescent behaviour (J04f)            | GRIP-J            |
| School experience                 | Adolescent        | Ado School Experience & Friends (P06f) | ÉCOBES-C          |
| Extracurricular activities        | Adolescent        | Ado School Experience & Friends (P06f) | ÉCOBES-D          |
| Drop-out attitudes                | Adolescent        | Ado School Experience & Friends (P06f) | ÉCOBES-E          |
| Teachers                          | Adolescent        | Ado School Experience & Friends (P06f) | ÉCOBES-F          |
| School performance                | Adolescent        | Ado School Experience & Friends (P06f) | ÉCOBES-G          |
| Working while studying            | Adolescent        | Ado School Experience & Friends (P06f) | Statistics Canada |
| Academic & vocational aspirations | Adolescent        | Ado School Experience & Friends (P06f) | ÉCOBES-H          |

## F. Self-attributes & Personality

| <b>Domains/Scales</b>        | <b>Respondent</b> | <b>Instrument (code name)</b>     | <b>Source</b> |
|------------------------------|-------------------|-----------------------------------|---------------|
| Industry (Rosenthal)         | Adolescent        | Positive Youth Development (B08f) | 4-H PYD-A     |
| Identity (Rosenthal)         | Adolescent        | Positive Youth Development (B08f) | 4-H PYD-A     |
| Intimacy (Rosenthal)         | Adolescent        | Positive Youth Development (B08f) | 4-H PYD-A     |
| Elective Selection (SOC)     | Adolescent        | Positive Youth Development (B08f) | 4-H PYD-B     |
| Optimization (SOC)           | Adolescent        | Positive Youth Development (B08f) | 4-H PYD-B     |
| Compensation (SOC)           | Adolescent        | Positive Youth Development (B08f) | 4-H PYD-B     |
| Depression (CES-D)           | Adolescent        | Positive Youth Development (B08f) | 4-H PYD-C     |
| Academic Competence (Harter) | Adolescent        | Positive Youth Development (B08f) | 4-H PYD-D     |
| Social Competence (Harter)   | Adolescent        | Positive Youth Development (B08f) | 4-H PYD-D     |
| Physical Competence (Harter) | Adolescent        | Positive Youth Development (B08f) | 4-H PYD-D     |
| Physical Appearance (Harter) | Adolescent        | Positive Youth Development (B08f) | 4-H PYD-D     |
| Conduct Behavior (Harter)    | Adolescent        | Positive Youth Development (B08f) | 4-H PYD-D     |
| Self-Worth (Harter)          | Adolescent        | Positive Youth Development (B08f) | 4-H PYD-D     |
| Connection to Community      | Adolescent        | Positive Youth Development (B08f) | 4-H PYD-E     |
| Connection to Family         | Adolescent        | Positive Youth Development (B08f) | 4-H PYD-E     |
| Connection to Peers          | Adolescent        | Positive Youth Development (B08f) | 4-H PYD-F     |
| Connection to School         | Adolescent        | Positive Youth Development (B08f) | 4-H PYD-E     |
| Maternal Warmth              | Adolescent        | Positive Youth Development (B08f) | 4-H PYD-G     |
| Paternal Warmth              | Adolescent        | Positive Youth Development (B08f) | 4-H PYD-G     |
| School Engagement            | Adolescent        | Positive Youth Development (B08f) | 4-H PYD-H     |
| Risk Avoidance               | Adolescent        | Positive Youth Development (B08f) | 4-H PYD-E     |
| Interpersonal Skills         | Adolescent        | Positive Youth Development (B08f) | 4-H PYD-E     |
| Adult Mentors                | Adolescent        | Positive Youth Development (B08f) | 4-H PYD-E     |
| Parental Monitoring          | Adolescent        | Positive Youth Development (B08f) | 4-H PYD-I     |
| Personal Values              | Adolescent        | Positive Youth Development (B08f) | 4-H PYD-J     |
| Positive Identity            | Adolescent        | Positive Youth Development (B08f) | 4-H PYD-K     |
| Social Conscience            | Adolescent        | Positive Youth Development (B08f) | 4-H PYD-E     |
| Social Responsibility        | Adolescent        | Positive Youth Development (B08f) | 4-H PYD-L     |
| Values Diversity             | Adolescent        | Positive Youth Development (B08f) | 4-H PYD-E     |

|                                                  |            |                                        |              |
|--------------------------------------------------|------------|----------------------------------------|--------------|
| Sympathy                                         | Adolescent | Positive Youth Development (B08f)      | 4-H PYD-M    |
| Puberty Development Scale                        | Adolescent | Positive Youth Development (B08f)      | 4-H PYD-N    |
| Confidence (Revised Mean Scale)                  | Adolescent | Positive Youth Development (B08f)      | 4-H PYD-J    |
| Competence (Revised Mean Scale)                  | Adolescent | Positive Youth Development (B08f)      | 4-H PYD-J    |
| Character (Revised Mean Scale)                   | Adolescent | Positive Youth Development (B08f)      | 4-H PYD-J    |
| Caring<br>(Standardized Mean of Eisenberg Scale) | Adolescent | Positive Youth Development (B08f)      | 4-H PYD-J    |
| Connection (5Cs - Revised Mean Scale)            | Adolescent | Positive Youth Development (B08f)      | 4-H PYD-J    |
| Positive Youth Development (Mean of 5Cs)         | Adolescent | Positive Youth Development (B08f)      | 4-H PYD-J    |
| Pro-social behaviour                             | Adolescent | Adolescent behaviour (J04f)            | GRIP-C       |
| Neuroticism                                      | Adolescent | Personality (P04f)                     | NEO PI-R     |
| Extroversion                                     | Adolescent | Personality (P04f)                     | NEO PI-R     |
| Openness                                         | Adolescent | Personality (P04f)                     | NEO PI-R     |
| Agreeableness                                    | Adolescent | Personality (P04f)                     | NEO PI-R     |
| Conscientiousness                                | Adolescent | Personality (P04f)                     | NEO PI-R     |
| Body esteem                                      | Adolescent | Healthy Lifestyle (J02f)               | Mendelson    |
| Body image                                       | Adolescent | Healthy Lifestyle (J02f)               | Sante Quebec |
| Peer influence                                   | Adolescent | Ado School Experience & Friends (P06f) | RPI          |

**Source:**

**SYS:** Saguenay Youth Study: Developed by the project team; **MNI:** Neuropsychology Unit, Montreal Neurological Institute & Hospital, McGill University, Montreal, Quebec, Canada; **GRIP,** Groupe de recherche sur l'inadaptation psychosociale chez l'enfant, University of Montreal, Montreal, Quebec, Canada; **DPS:** DISC Predictive Scales (Lucas et al. 2001; adapted by JJ Breton, Riviere-des-Prairies Hospital, Montreal, Quebec, Canada); **Goodman D,** Simon Fraser University, Vancouver, BC, Canada; **ECOBES,** Le Groupe d'Étude des Conditions de vie et des BESOins de la population, Cegep Jonquiere, Quebec, Canada; **Carrier J,** University of Montreal, Montreal, Quebec, Canada; **4-H PYD:** 4-H Study of Positive Youth Development (Richard Lerner and colleagues, Tufts University, MA, U.S.A.); **RPI:** Resistance to Peer Influence Scale (Steinberg 2002); **Sante Quebec:** Questionnaire aux adolescentes et adolescents; **Statistics Canada:** Youth In Transition Survey, 2000;

**GRIP-A:** Based on Radloff 1977; **GRIP-B:** Based on Séguin et al. 2000; **GRIP-C:** Based on Behar & Stringfield (1974), Weir & Duveen (1981), Rutter (1967), Offord (1987), Ontario Child Health Study and the Child Behavior Checklist (CBCL); **GRIP-D:** Based on Enquête nationale sur la santé de la population; **GRIP-E:** Based on Loiselle 2000; **GRIP-F:** Based on Selzer 1971; **GRIP-G:** Based on

Robins et al. 1981 and Zoccolillo et al. 1999; **GRIP-H**: Based on Vaillancourt et al. 2003; **GRIP-I**: Based on LeBlanc M 1988; **GRIP-J**: Based on Malo & Tremblay 1995;

**ÉCOBES-A**: Based on Le Blanc 1996; **ÉCOBES-B**: Based on Galland 1994; **ÉCOBES-C**: Based on Ntamakiliro et al. 2000; **ÉCOBES-D**: Based on Janosz 2002; **ÉCOBES-E**: Based on Janosz et al. 1999; **ÉCOBES-F**: Based on Larose & Boivin 1998; **ÉCOBES-G**: Based on Rosenberg et al. 1995, Ntamakiliro et al. 2000; **ÉCOBES-H**: Based on Bélanger et al. 1972;

**4-H PYD-A**: Based on Erikson Psychological Stage Inventory (Rosenthal et al 1981); **4-H PYD-B**: Based on Selection, Optimization and Compensation Questionnaire (Freund & Bates 2002); **4-H PYD-C**: Based on Radloff 1977; **4-H PYD-D**: Based on The Self-Perception Profile for Children (Harter 1983); **4-H PYD-E**: Based on Theokas et al. 2005; **4-H PYD-F**: Based on Peer Support Scale of Teen Assessment Project Survey Question Bank; Small & Rodgers 1995; **4-H PYD-G**: Based on the Child's report of Parenting Behaviors Inventory; Schludermann & Schludermann 1970; **4-H PYD-H**: Based on School Engagement Scale of Profiles of Student Life: Attitudes and Behaviours; Benson 1998, Leffert 1998, Scales 2000; **4-H PYD-I**: Based on Parental Monitoring Scale (Small & Kerns 1993); **4-H PYD-J**: Based on Lerner et al. 2005; **4-H PYD-K**: Based on Target Based Beliefs Scale (Buchanan & Holmbeck 1998); **4-H PYD-L**: Based on Social Responsibility Scale of Teen Assessment Project Survey Question Bank (Small & Rodgers 1995); **4-H PYD-M**: Based on Sympathy Scale (Eisenberg et al. 1996); **4-H PYD-N**: Based on Puberty Development Scale (Petersen et al 1988).
